# Supplementary material for: Circularly polarised luminescence (CPL) control of oligopeptide–Eu(iii) hybridized luminophores by interaction with peptide side chains
Source: Royal Society of Chemistry journal article supplement (doi:10.1039/c9ra09708b), 2020-01-01
Supplement: c9ra09708b1.pdf [file c9ra09708b1.pdf]

## Electronic Supporting Information

### Circularly Polarised Luminescence (CPL) Control of Oligopeptide-Eu(III)

#### Hybridized Luminophores by interaction with peptide side chains

**Yuki Mimura,<sup>a</sup> Takuya Sato,<sup>a</sup> Yuki Motomura,<sup>a</sup> Hiroki Yoshikawa,<sup>a</sup> Motohiro Shizuma,<sup>b</sup>  
Mizuki Kitamatsu\*<sup>a</sup> and Yoshitane Imai\*<sup>a</sup>**

<sup>a</sup> Department of Applied Chemistry, Faculty of Science and Engineering, Kindai University, 3-4-1 Kowakae, Higashi-Osaka, Osaka 577-8502, Japan.

E-mail: (Y.I.) [y-imai@apch.kindai.ac.jp](mailto:y-imai@apch.kindai.ac.jp). (M.K.) [kitamatu@apch.kindai.ac.jp](mailto:kitamatu@apch.kindai.ac.jp).

<sup>b</sup> Department of Biochemistry, Osaka Research Institute of Industrial Science and Technology, 1-6-50 Morinomiya, Joto-ku, Osaka 536-8553, Japan.

## Table of Contents

|                                                                                                                                                      |     |
|------------------------------------------------------------------------------------------------------------------------------------------------------|-----|
| <b>Experimental Section</b> .....                                                                                                                    | S3  |
| <b>Fig. S1</b> Mass spectra of <b>L-1</b> .....                                                                                                      | S4  |
| <b>Fig. S2</b> Mass spectra of <b>L-2</b> .....                                                                                                      | S4  |
| <b>Fig. S3</b> Mass spectra of <b>L-3</b> .....                                                                                                      | S5  |
| <b>Fig. S4</b> Mass spectra of <b>L-4</b> .....                                                                                                      | S5  |
| <b>Fig. S5</b> CPL and PL spectra as a function of <b>L-1</b> or <b>D-1</b> / $\text{Eu}(\text{hfa})_3$ ratio in chloroform.....                     | S8  |
| <b>Fig. S6</b> CPL and PL spectra as a function of <b>L-2</b> or <b>D-2</b> / $\text{Eu}(\text{hfa})_3$ ratio in chloroform.....                     | S9  |
| <b>Fig. S7</b> CPL and PL spectra as a function of <b>L-3</b> or <b>D-3</b> / $\text{Eu}(\text{hfa})_3$ ratio in chloroform.....                     | S10 |
| <b>Fig. S8</b> CPL and PL spectra as a function of <b>L-4</b> or <b>D-4</b> / $\text{Eu}(\text{hfa})_3$ ratio in chloroform.....                     | S11 |
| <b>Fig. S9</b> CPL and PL spectra of <b>L-</b> or <b>D-1~4</b> in chloroform.....                                                                    | S12 |
| <b>Fig. S10</b> CD and UV-Vis absorption spectra as a function of <b>L-1~4</b> or <b>D-1~4</b> / $\text{Eu}(\text{hfa})_3$ ratio in chloroform.....  | S13 |
| <b>Fig. S11</b> CD and UV-Vis absorption spectra as a function of <b>L-3</b> / $\text{Eu}(\text{hfa})_3$ ratio in chloroform.....                    | S14 |
| <b>Fig. S12</b> CD and UV-Vis absorption spectra of <b>L-1~4</b> in chloroform.....                                                                  | S15 |
| <b>Fig. S13</b> Positive-mode electrospray Mass spectrum of <b>L-1</b> / $\text{Eu}(\text{hfa})_3$ (1/1).....                                        | S16 |
| <b>Fig. S14</b> Positive-mode electrospray Mass spectrum of <b>L-2</b> / $\text{Eu}(\text{hfa})_3$ (1/1).....                                        | S17 |
| <b>Fig. S15</b> Positive-mode electrospray Mass spectrum of <b>L-3</b> / $\text{Eu}(\text{hfa})_3$ (1/1).....                                        | S17 |
| <b>Fig. S16</b> Positive-mode electrospray Mass spectrum of <b>L-3</b> / $\text{Eu}(\text{hfa})_3$ (1/2).....                                        | S18 |
| <b>Fig. S17</b> Positive-mode electrospray Mass spectrum of <b>L-3</b> / $\text{Eu}(\text{hfa})_3$ (1/3).....                                        | S19 |
| <b>Fig. S18</b> Positive-mode electrospray Mass spectrum of <b>L-4</b> / $\text{Eu}(\text{hfa})_3$ (1/1).....                                        | S19 |
| <b>Fig. S19</b> $^{19}\text{F}$ -NMR spectrum of $\text{Eu}(\text{hfa})_3$ and <b>L-1</b> / $\text{Eu}(\text{hfa})_3$ (1/1) in $\text{CDCl}_3$ ..... | S20 |
| <b>Fig. S20</b> $^{19}\text{F}$ -NMR spectrum of $\text{Eu}(\text{hfa})_3$ and <b>L-2</b> / $\text{Eu}(\text{hfa})_3$ (1/1) in $\text{CDCl}_3$ ..... | S20 |
| <b>Fig. S21</b> $^{19}\text{F}$ -NMR spectrum of $\text{Eu}(\text{hfa})_3$ and <b>L-3</b> / $\text{Eu}(\text{hfa})_3$ (1/1) in $\text{CDCl}_3$ ..... | S20 |
| <b>Fig. S22</b> $^{19}\text{F}$ -NMR spectrum of $\text{Eu}(\text{hfa})_3$ and <b>L-3</b> / $\text{Eu}(\text{hfa})_3$ (1/2) in $\text{CDCl}_3$ ..... | S21 |
| <b>Fig. S23</b> $^{19}\text{F}$ -NMR spectrum of $\text{Eu}(\text{hfa})_3$ and <b>L-3</b> / $\text{Eu}(\text{hfa})_3$ (1/3) in $\text{CDCl}_3$ ..... | S21 |
| <b>Fig. S24</b> $^{19}\text{F}$ -NMR spectrum of $\text{Eu}(\text{hfa})_3$ and <b>L-4</b> / $\text{Eu}(\text{hfa})_3$ (1/1) in $\text{CDCl}_3$ ..... | S21 |

## Experimental Section

### Reagents and chemicals

For spectroscopic measurements, spectroscopic-grade  $\text{CHCl}_3$  (Dojindo [Kumamoto, Japan], Spectrosol) was used.  $\text{Eu(III)(hfa)}_3(\text{H}_2\text{O})_2$  was prepared according to a previously reported method.<sup>[1]</sup>

### Syntheses of chiral peptide-naphthalene ligands 1-4

Fmoc deprotection was carried out with 20% piperidine in DMF (for 7 min at room temperature). After six times washing with DMF, each amino acid was coupled using HBTU/NMM reagents with reaction time of 40 min per coupling at room temperature. No capping step was carried out. After the *N*-terminal Fmoc group was deprotected, the resin was washed with DCM and was treated with 95% TFA, 2.5% water, 2.5% TIS for 1.5 hours at room temperature. The crude peptides were analysed and purified by reversed phase high-pressure liquid chromatography (RP-HPLC) on C18 column with buffer A. 0.1% TFA in water; buffer B, acetonitrile and monitoring at 280 nm with a gradient of 0-100% B gradient over 20 min. The purified peptides were identified with MALDI-TOF mass spectroscopy (matrix,  $\alpha$ -CHCA) (Figures S1-S4) and RP-HPLC.

The yields of peptides were 77% (9.8 mg; **L-1**), 67% (10.4 mg; **L-2**), 63% (11.7 mg; **L-3**), 59% (12.6 mg; **L-4**), 82% (10.4 mg; **D-1**), 69% (10.8 mg; **D-2**), 57% (10.5 mg; **D-3**), and 56% (12.0 mg; **D-4**).

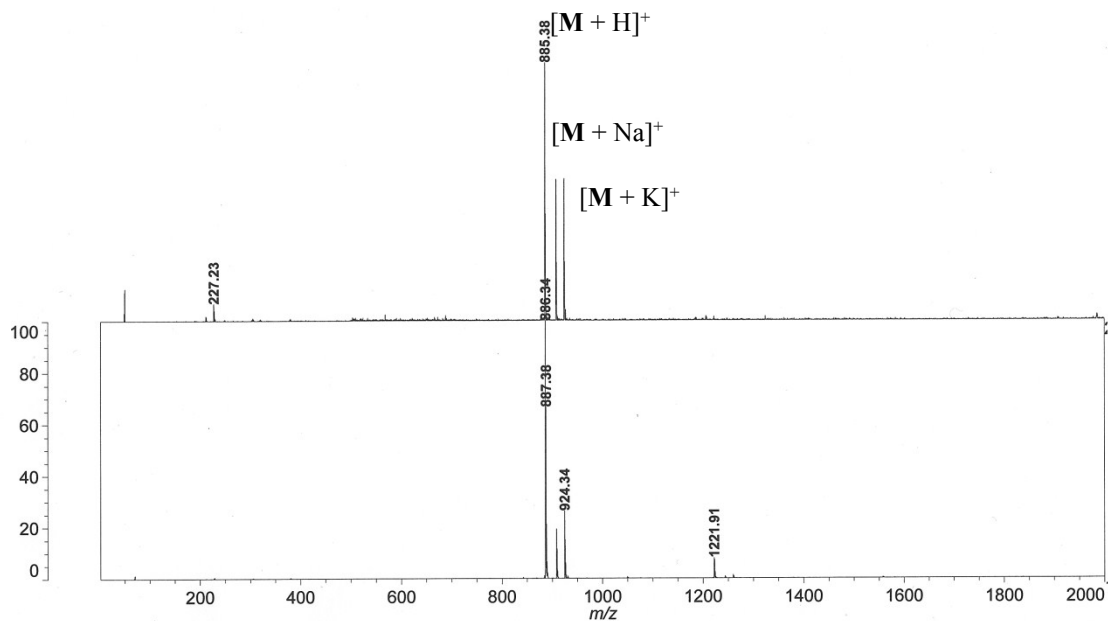

**Fig. S1** MALDI-TOF mass spectra of **L-1** (lower) and **D-1** (upper). An  $\alpha$ -CHCA was used as a matrix. **L-1**; calcd.  $m/z$  885.50 for  $[M+H]^+$ , obsd.  $m/z$  886.34, **D-1**; calcd.  $m/z$  885.50 for  $[M+H]^+$ , obsd.  $m/z$  885.38.

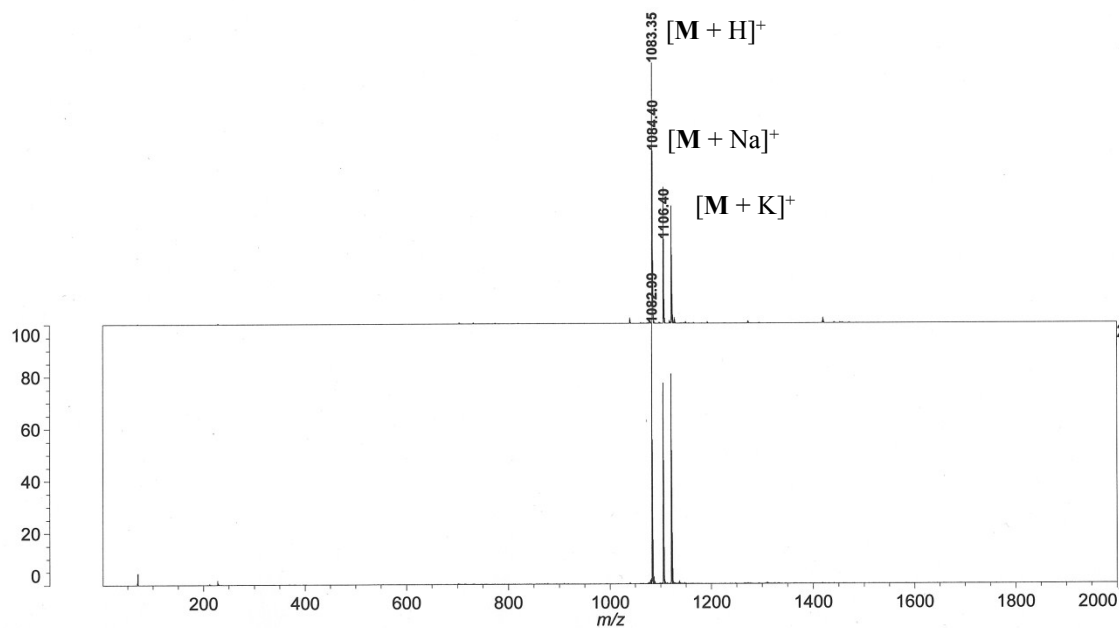

**Fig. S2** MALDI-TOF mass spectra of **L-2** (lower) and **D-2** (upper). An  $\alpha$ -CHCA was used as a matrix. **L-2**; calcd.  $m/z$  1082.58 for  $[M+H]^+$ , obsd.  $m/z$  1082.99, **D-2**; calcd.  $m/z$  1082.58 for  $[M+H]^+$ , obsd.  $m/z$  1083.55.

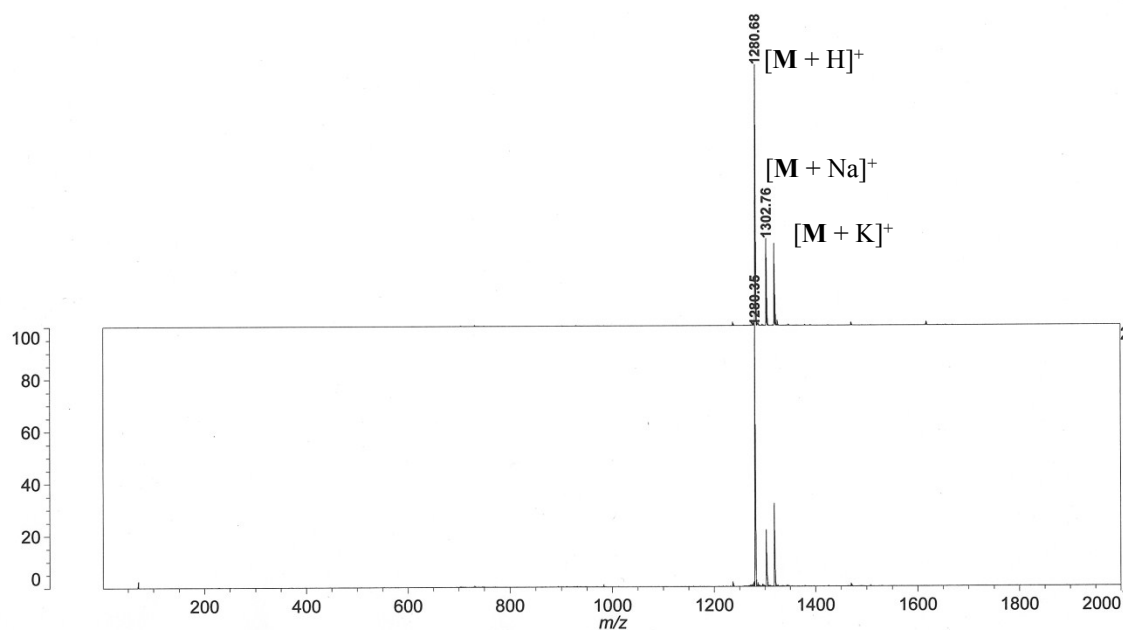

**Fig. S3** MALDI-TOF mass spectra of **L-3** (lower) and **D-3** (upper). An  $\alpha$ -CHCA was used as a matrix. **L-3**; calcd.  $m/z$  1279.67 for  $[M+H]^+$ , obsd.  $m/z$  1280.35, **D-3**; calcd.  $m/z$  1279.67 for  $[M+H]^+$ , obsd.  $m/z$  1280.68.

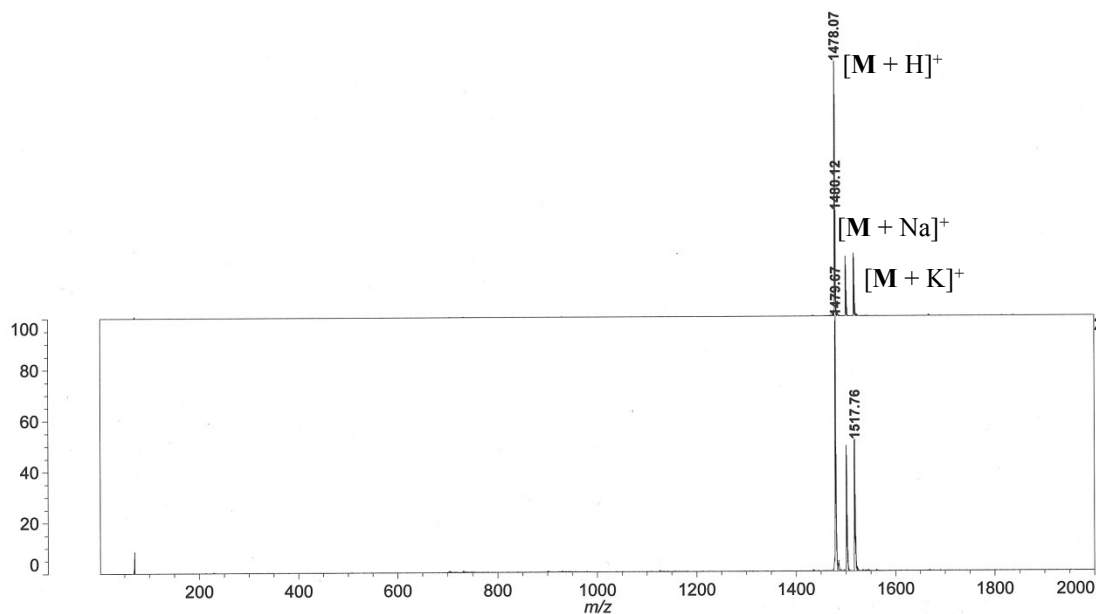

**Fig. S4** MALDI-TOF mass spectra of **L-4** (lower) and **D-4** (upper). An  $\alpha$ -CHCA was used as a matrix. **L-4**; calcd.  $m/z$  1476.75 for  $[M+H]^+$ , obsd.  $m/z$  1478.60, **D-4**; calcd.  $m/z$  1476.75 for  $[M+H]^+$ , obsd.  $m/z$  1478.07.

### **Measurement of absolute unpolarised photoluminescence (PL) quantum yield**

The absolute unpolarised photoluminescence (PL) quantum yields were measured using an Absolute PL Quantum Yield Measurement System (C9920-02, Hamamatsu Photonics [Hamamatsu, Japan]) in air at room temperature. The excitation wavelength in CHCl<sub>3</sub> (path length 10 mm) was 300 nm. Spectroscopic-grade CHCl<sub>3</sub> (Dojindo [Kumamoto, Japan], Spectrosol) was used for spectroscopic measurements.

### **Measurement of photoluminescence and CPL spectra**

The CPL spectra were obtained with a JASCO (Hachioji, Japan) CPL-300 spectrofluoropolarimeter at room temperature. A scattering angle of 0° was used for the excitation of non-polarised monochromatic incident light with a bandwidth of 10 nm and a bandwidth for emission of 10 nm. Scanning speed was 50 nm per min and the time constant of PMT was 8 s. The CPL and PL spectra were smoothed by 2 accumulation without any numerical smoothing. For spectroscopic measurements, spectroscopic-grade CHCl<sub>3</sub> (Dojindo [Kumamoto, Japan], Spectrosol) were used. The excitation wavelength in CHCl<sub>3</sub> solution was 300 nm (path length 10 mm).

### **Measurement of circular dichroism (CD) and UV-Vis absorption spectra**

The circular dichroism (CD) and UV-Vis absorption spectra of the compounds in CHCl<sub>3</sub> solution states were measured using a JASCO J-820 spectropolarimeter at room temperature. The path length in solution measurement was 1 mm. Spectroscopic-grade CHCl<sub>3</sub> solutions (Dojindo [Kumamoto, Japan], Spectrosol) was used for spectroscopic measurements.

### **Measurement of MASS spectra**

#### **1. Mass spectrometry**

Mass spectra were taken with a LCMS-IT-TOF mass spectrometer (Shimadzu Co. [Kyoto, Japan]) under the following conditions: ionization method, electrospray ionization (ESI); solvent, acetonitrile; mass range,  $m/z$  100 – 4000; mode, positive; spray voltage, 4.5 kV (positive mode), or –3.5 kV (negative mode); nebulizer gas flow rate; 1.5 L min<sup>-1</sup>; CDL temperature, 200 °C; heat block temperature, 200 °C; ion source pressure, 80 Pa; ion trap pressure, 1.8×10<sup>-2</sup> Pa; TOF pressure, 1.4×10<sup>-4</sup> Pa; resolution, >10,000. Calibration and

tuning of the instrument were carried out using an available standard solution of trifluoroacetic acid (Shimadzu Co. [Kyoto, Japan]).

### Measurement of NMR spectra

$^{19}\text{F}$ -NMR spectra were taken with a JEOL ECA 600 spectrometer. Trifluoroacetic acid in chloroform-*d* was used as the external reference ( $\delta = -76.5$  ppm).

NMR spectra were recorded on a JNM ECA-600 spectrometer (JEOL [Hachioji, Japan]). Samples were dissolved in chloroform-*d*.  $^{19}\text{F}$ -NMR spectra were measured in the proton decoupling mode. Trifluoroacetic acid was used as an external standard ( $\delta = -76.5$  ppm in chloroform-*d*) in  $^{19}\text{F}$ -NMR experiments.

### References:

- [1] N. Hara, M. Okazaki, M. Shizuma, S; Marumoto, N. Tajima, M. Fujiki and Y. Imai, *ChemistrySelect*, 2017, **2**, 10317.

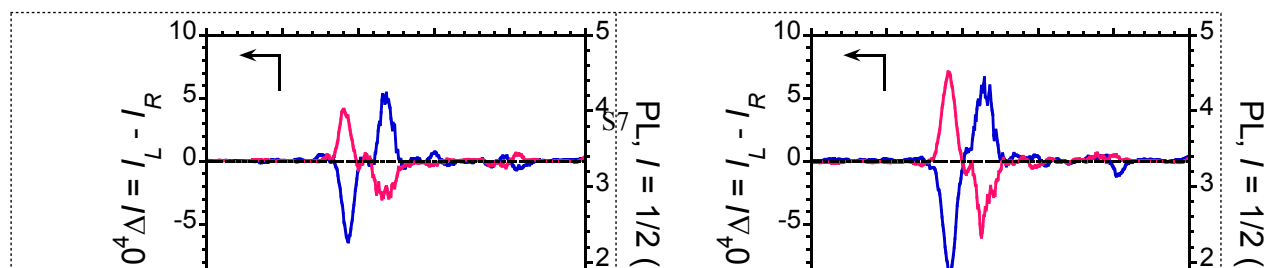

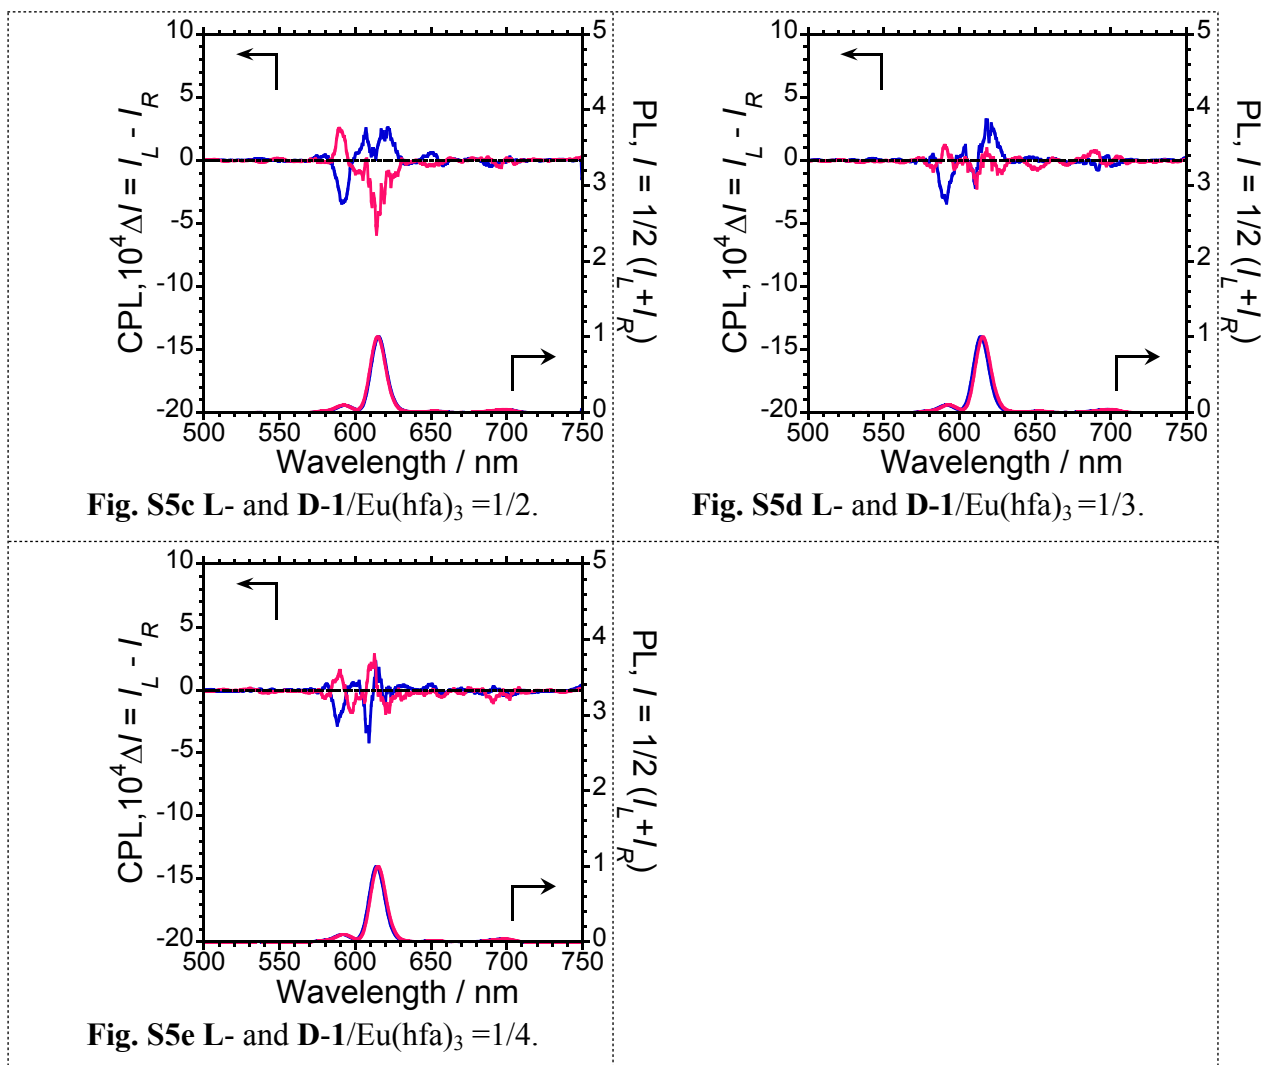

**Fig. S5** CPL and PL spectra as a function of molar ratio of L-1 (blue lines) (and D-1 (red lines)) to Eu(hfa)<sub>3</sub> in EtOH-free chloroform. Path length 10 mm.  $\lambda_{\text{ex}} = 300$  nm. [Eu(hfa)<sub>3</sub>]<sub>0</sub> =  $1.0 \times 10^{-4}$  M. Bandwidth for emission 10 nm, bandwidth for excitation 10 nm, response time of PMT 8 s, scanning rate 50 nm per min, and two-time scan.

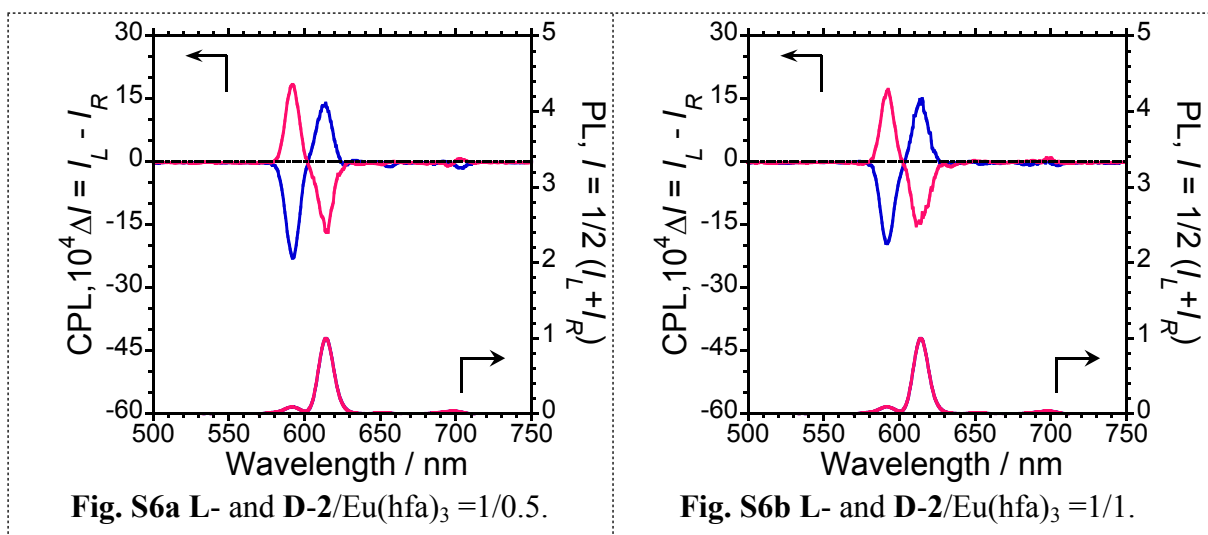



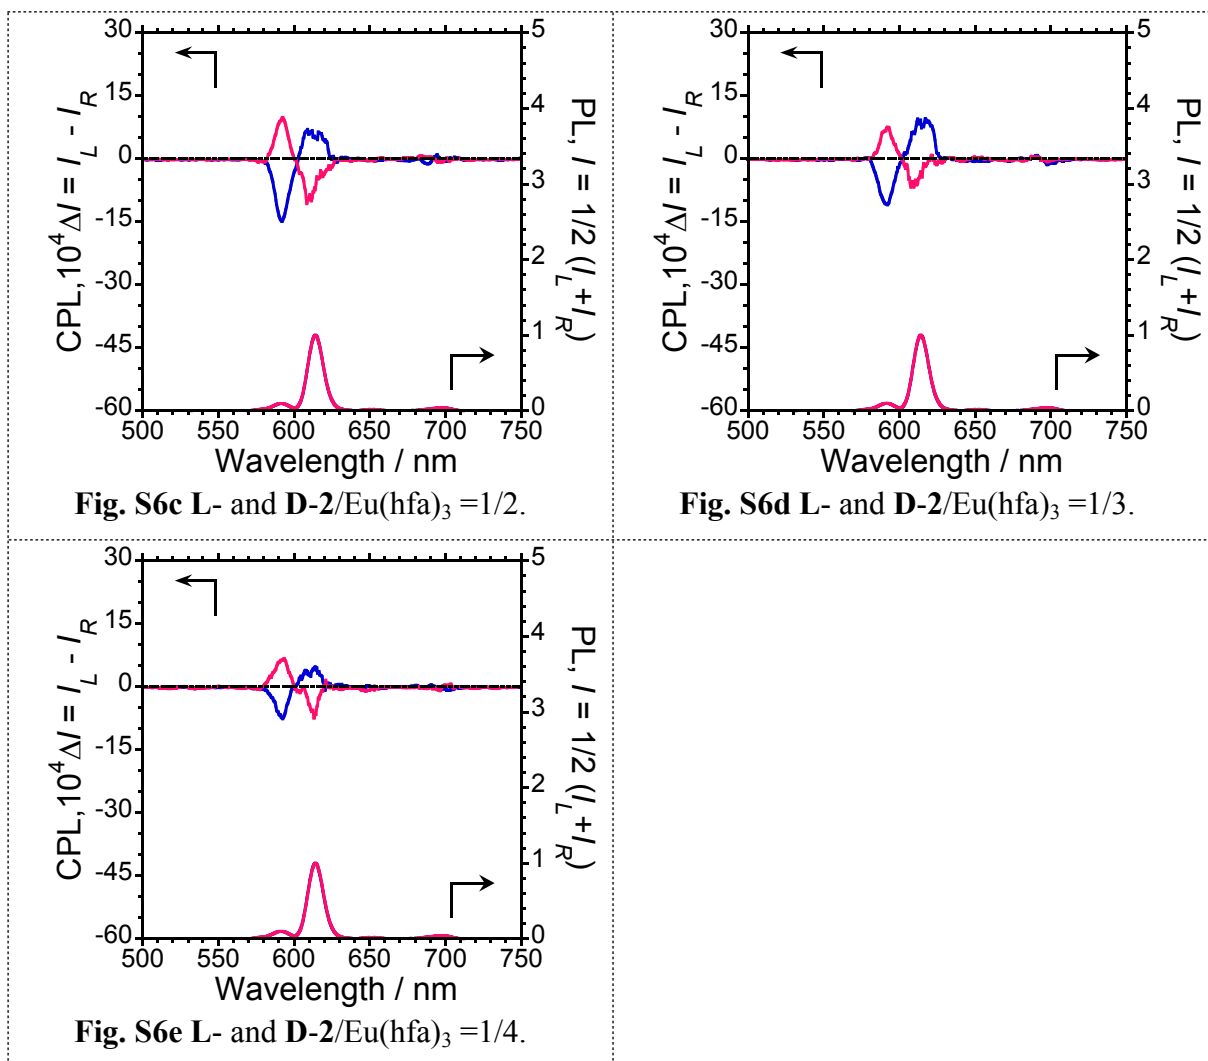

**Fig. S6** CPL and PL spectra as a function of molar ratio of L-2 (blue lines) (and D-2 (red lines)) to Eu(hfa)<sub>3</sub> in EtOH-free chloroform. Path length 10 mm.  $\lambda_{\text{ex}} = 300$  nm.  $[\text{Eu}(\text{hfa})_3]_0 = 1.0 \times 10^{-4}$  M. Bandwidth for emission 10 nm, bandwidth for excitation 10 nm, response time of PMT 8 s, scanning rate 50 nm per min, and two-time scan.

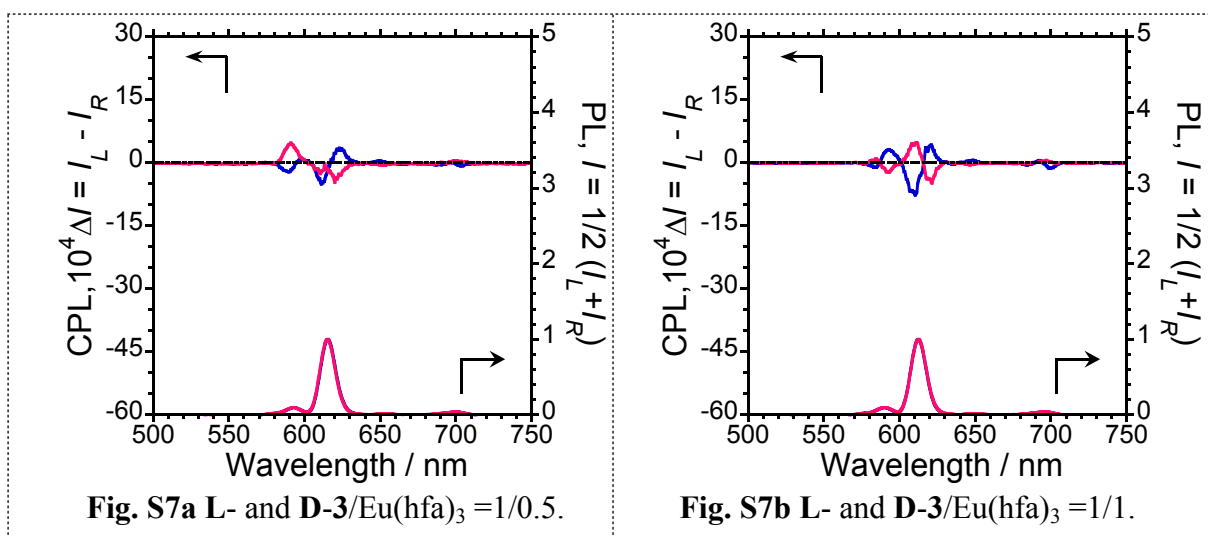

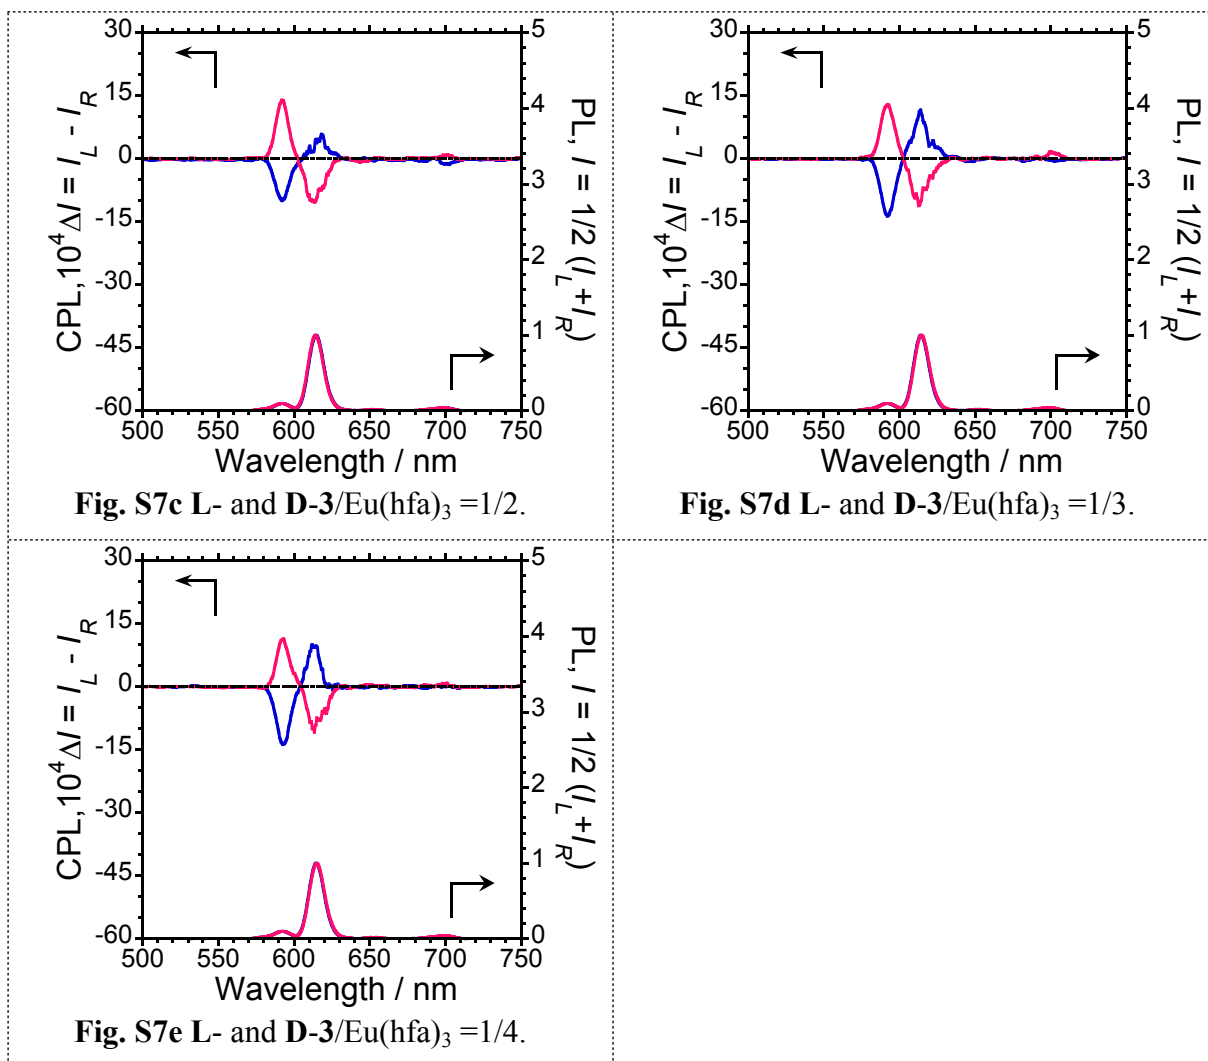

**Fig. S7** CPL and PL spectra as a function of molar ratio of **L-3** (blue lines) (and **D-3** (red lines)) to Eu(hfa)<sub>3</sub> in EtOH-free chloroform. Path length 10 mm.  $\lambda_{\text{ex}} = 300$  nm. [Eu(hfa)<sub>3</sub>]<sub>0</sub> =  $1.0 \times 10^{-4}$  M. Bandwidth for emission 10 nm, bandwidth for excitation 10 nm, response time of PMT 8 s, scanning rate 50 nm per min, and two-time scan.

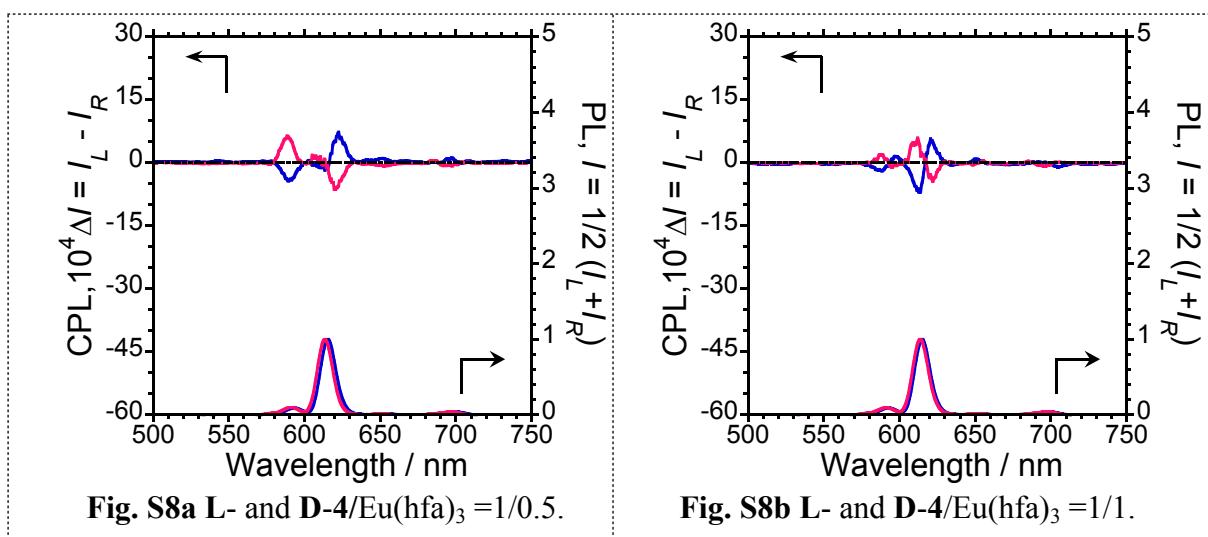

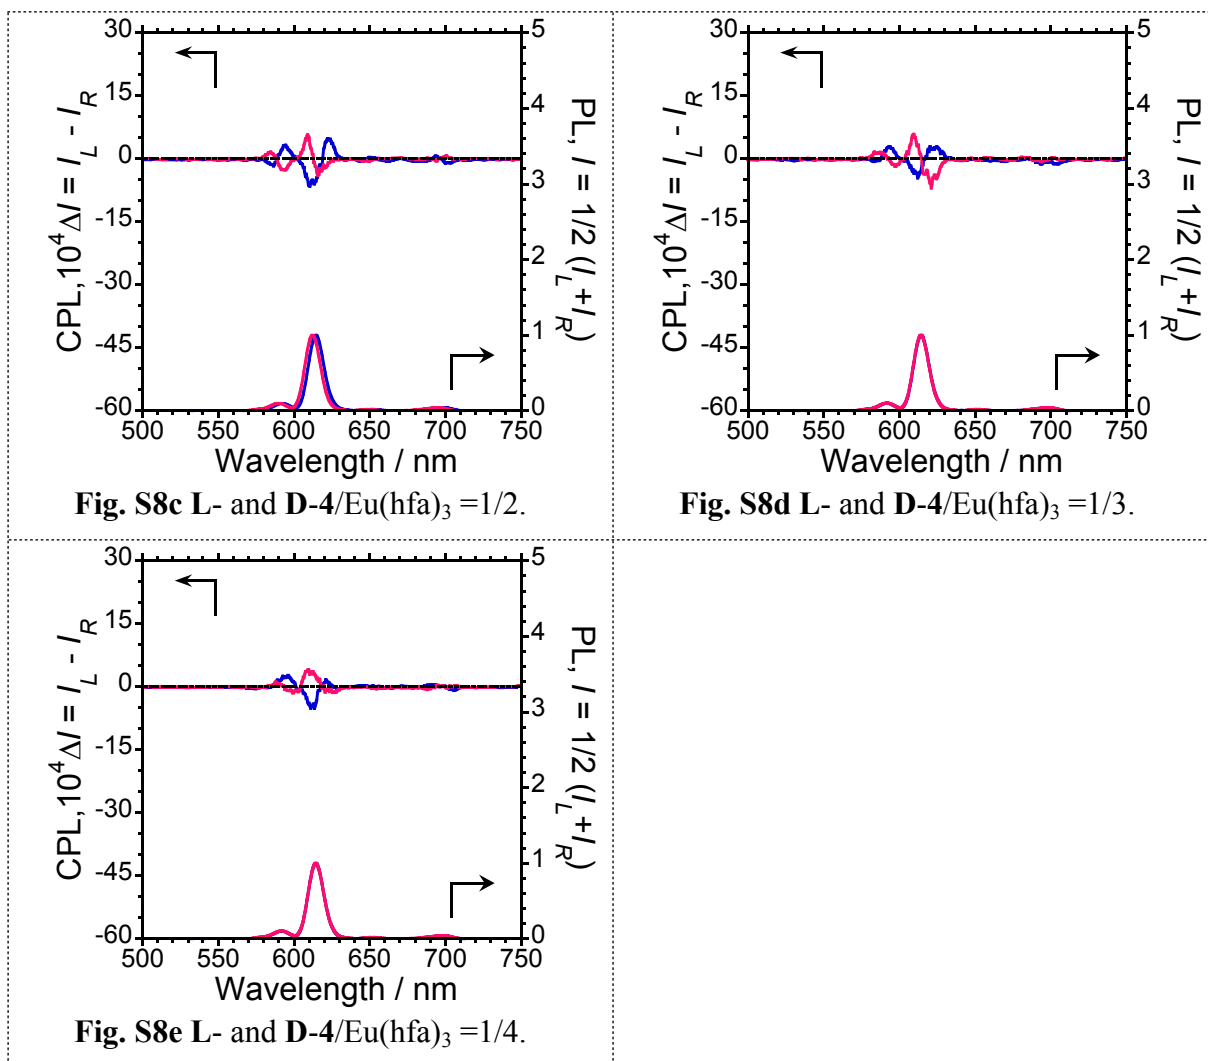

**Fig. S8** CPL and PL spectra as a function of molar ratio of L-4 (blue lines) (and D-4 (red lines)) to Eu(hfa)<sub>3</sub> in EtOH-free chloroform. Path length 10 mm.  $\lambda_{\text{ex}} = 300$  nm. [Eu(hfa)<sub>3</sub>]<sub>0</sub> =  $1.0 \times 10^{-4}$  M. Bandwidth for emission 10 nm, bandwidth for excitation 10 nm, response time of PMT 8 s, scanning rate 50 nm per min, and two-time scan.

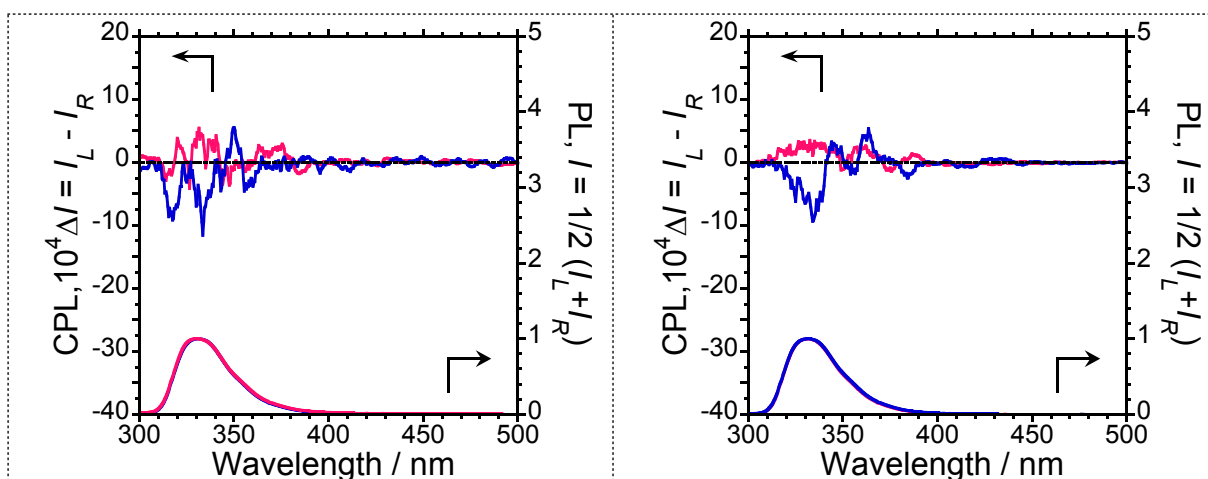

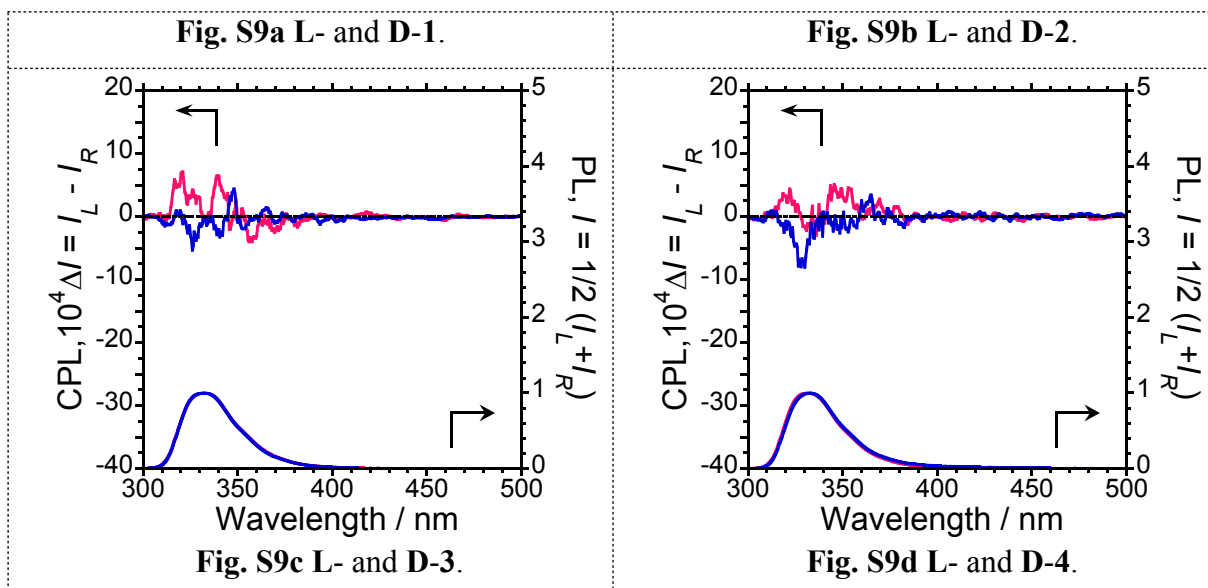

**Fig. S9** CPL and PL spectra of (a) **1**, (b) **2**, (c) **3**, and (d) **4** in EtOH-free chloroform. Blue and red lines are **L**- and **D**-isomers, respectively. Path length 10 mm.  $\lambda_{\text{ex}} = 270$  nm. Conc. =  $1.0 \times 10^{-4}$  M. Bandwidth for emission 10 nm, bandwidth for excitation 10 nm, response time of PMT 8 s, scanning rate 50 nm per min, and two-time scan.

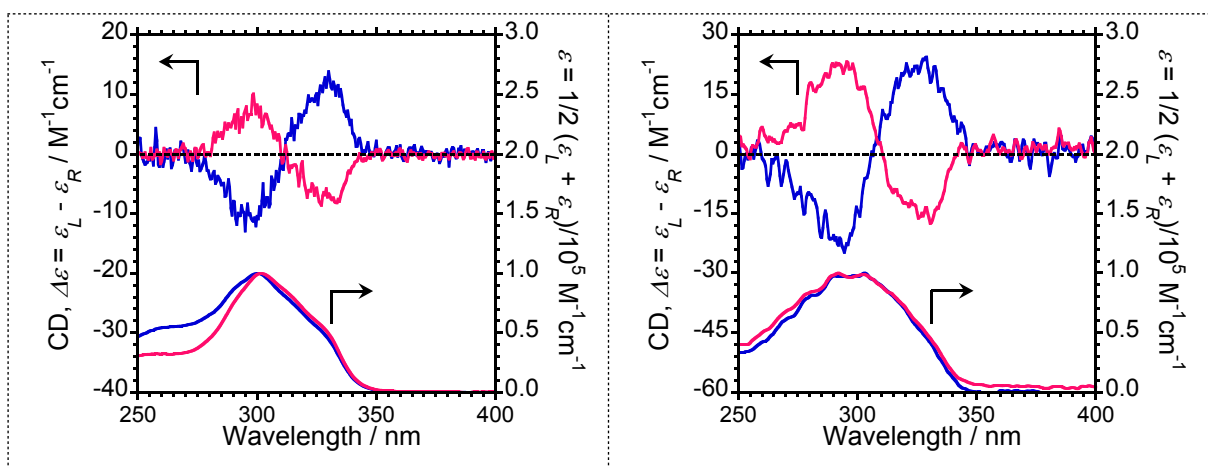

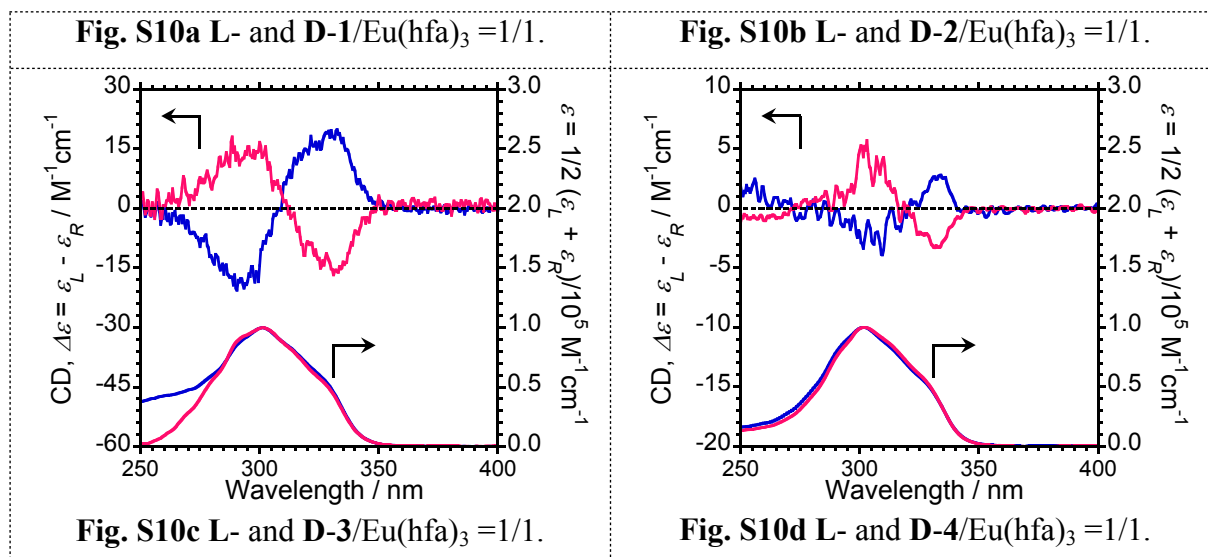

**Fig. S10** Comparison of CD and UV spectra of (a) 1/Eu(hfa)<sub>3</sub> = 1/1, (b) 2/Eu(hfa)<sub>3</sub> = 1/1, (c) 3/Eu(hfa)<sub>3</sub> = 1/1, and (d) 4/Eu(hfa)<sub>3</sub> = 1/1 (in nominal molar ratio) in EtOH-free chloroform. Blue and red lines are L- and D-isomers, respectively. Path lengths were commonly 1 mm. [Eu]<sub>0</sub> = 1.0 × 10<sup>-4</sup> M in EtOH-free chloroform.

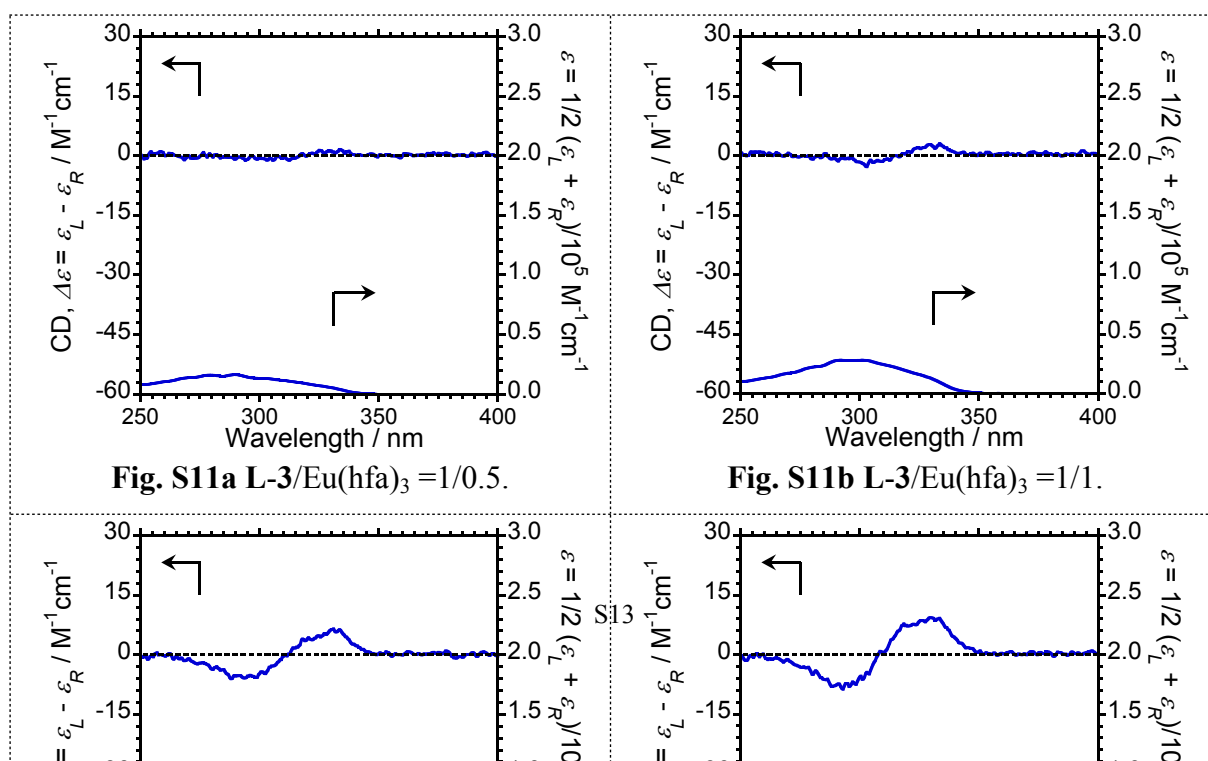

**Fig. S11** Comparison of CD and UV spectra of (a) **L-3**/Eu(hfa)<sub>3</sub> = 1/0.5, (b) **L-3**/Eu(hfa)<sub>3</sub> = 1/1, (c) **L-3**/Eu(hfa)<sub>3</sub> = 1/2, and **L-3**/Eu(hfa)<sub>3</sub> = 1/3 (in nominal molar ratio) in EtOH-free chloroform. Blue lines are **L**-isomers, respectively. Path lengths were commonly 1 mm. [Eu]<sub>0</sub> = 1.0 × 10<sup>-4</sup> M in EtOH-free chloroform.

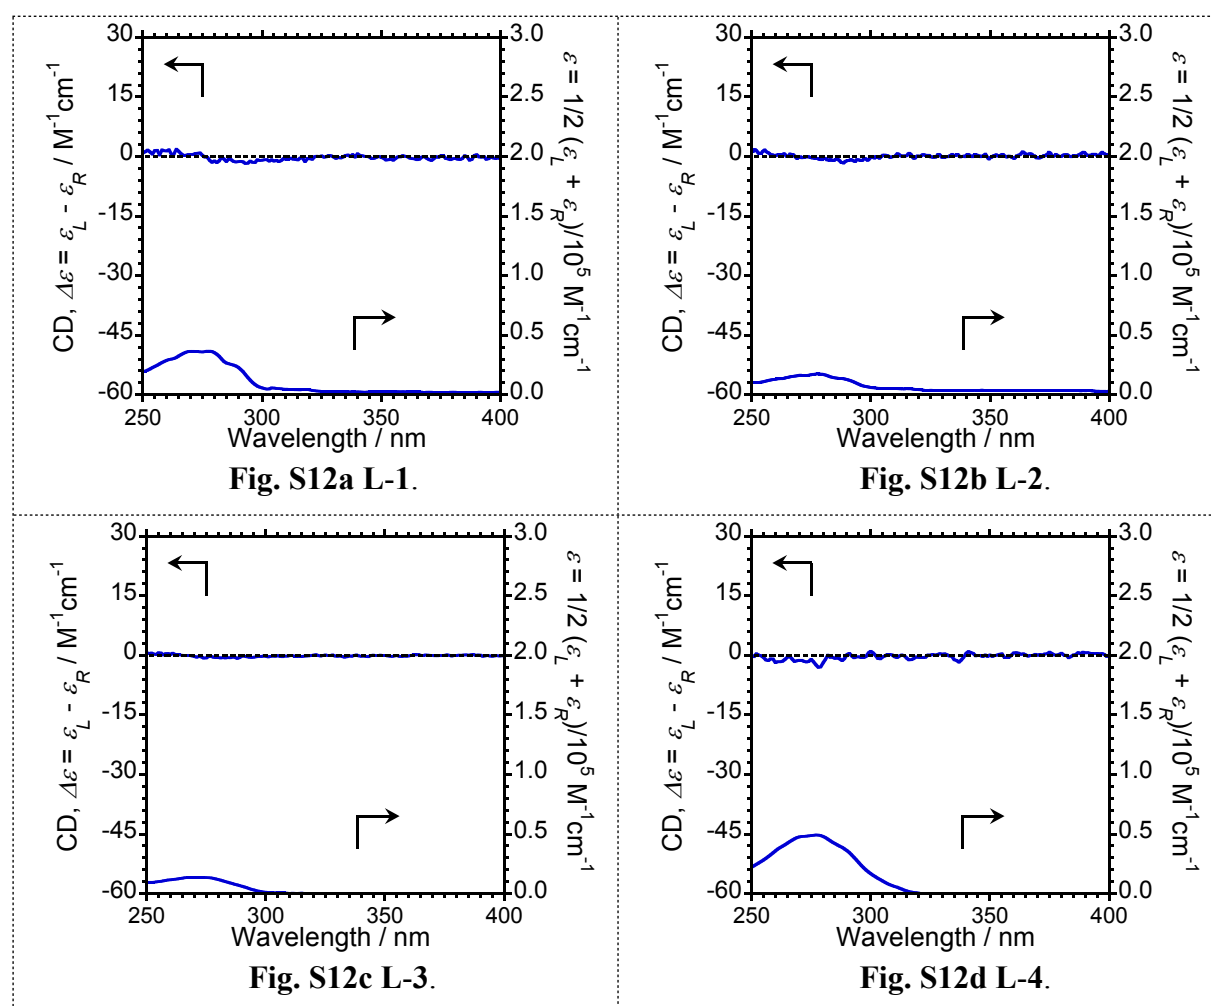

**Fig. S12** Comparison of CD and UV spectra of (a) **L-1**, (b) **L-2**, (c) **L-3**, and (d) **L-4** in EtOH-free chloroform. Conc. = 1.0 × 10<sup>-4</sup> M. Path lengths were 1 mm. (Path length of only 1

was 10 mm.)

(a)

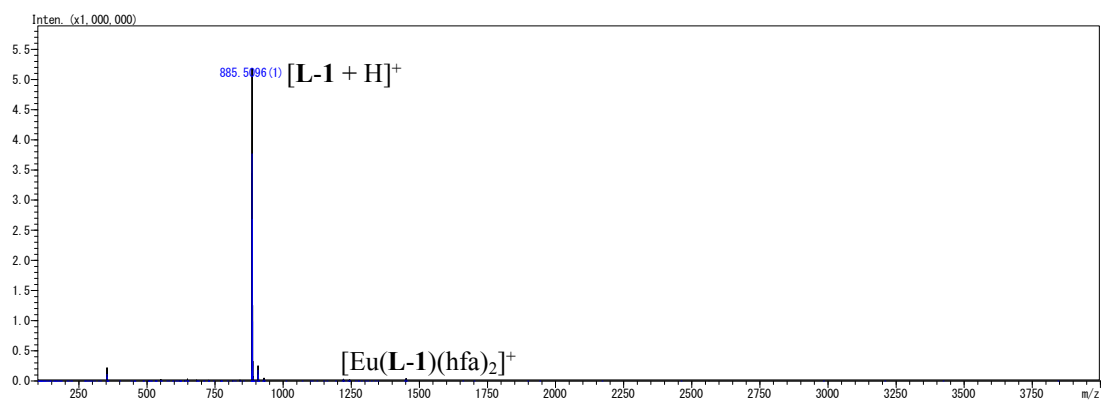

(b)

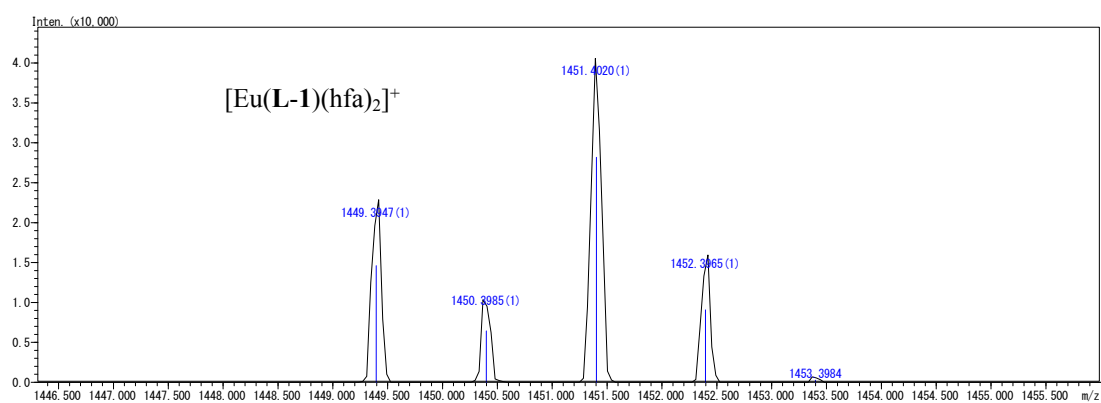

**Fig. S13** Mass spectra of **L-1/Eu(hfa)<sub>3</sub>** (1/1)

(a) All range, and (b) expanded range. Found  $m/z$  1451.4020, calcd.  $m/z$  1451.3970 as  $[\text{Eu}(\text{L-1})(\text{hfa})_2]^+$ .

(a)

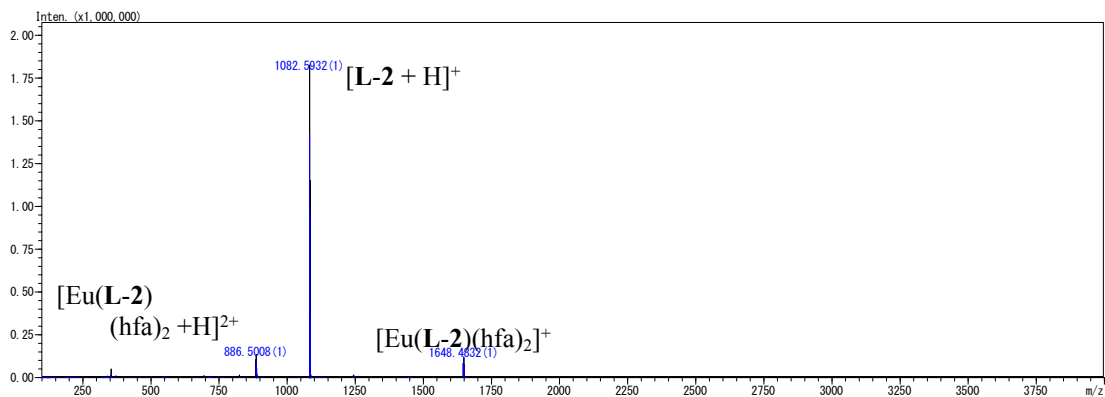

(b)

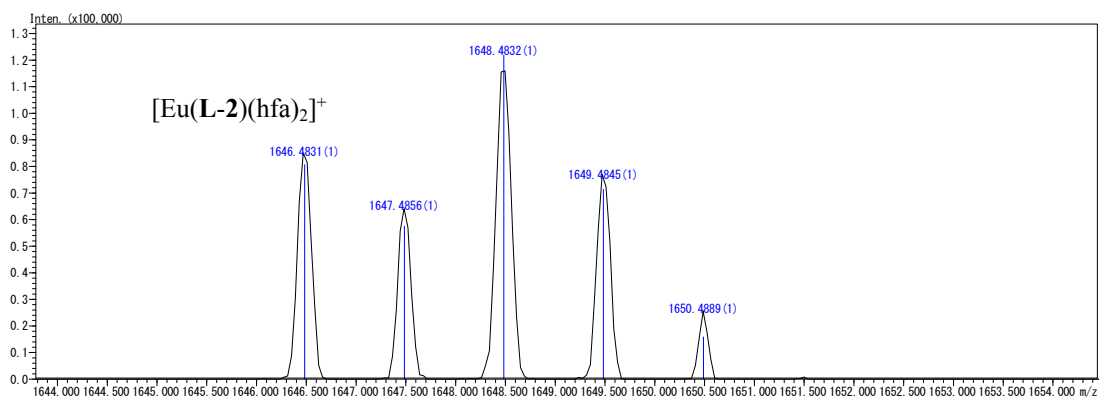

**Fig. S14** Mass spectra of L-2/Eu(hfa)<sub>3</sub> (1/1)

(a) All range, and (b) expanded range. Found  $m/z$  1648.4832, calcd.  $m/z$  1648.4814 as  $[Eu(L-2)(hfa)_2]^+$ .

(a)

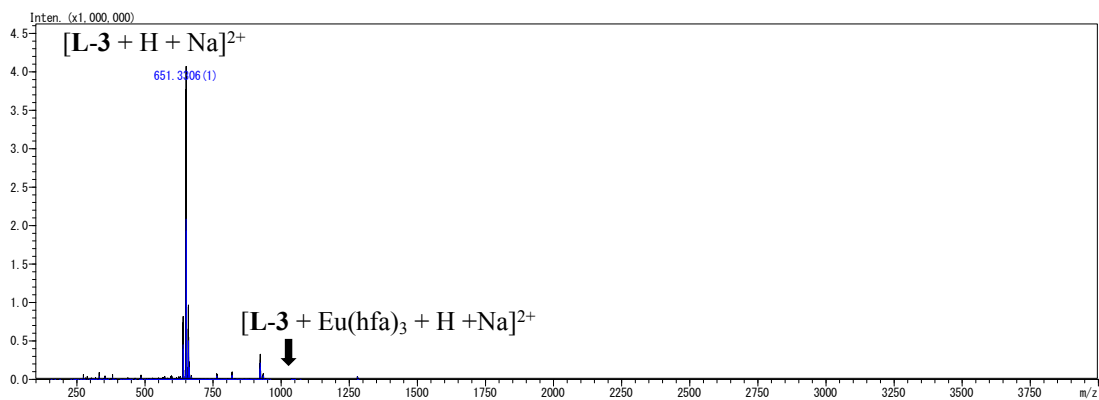

(b)



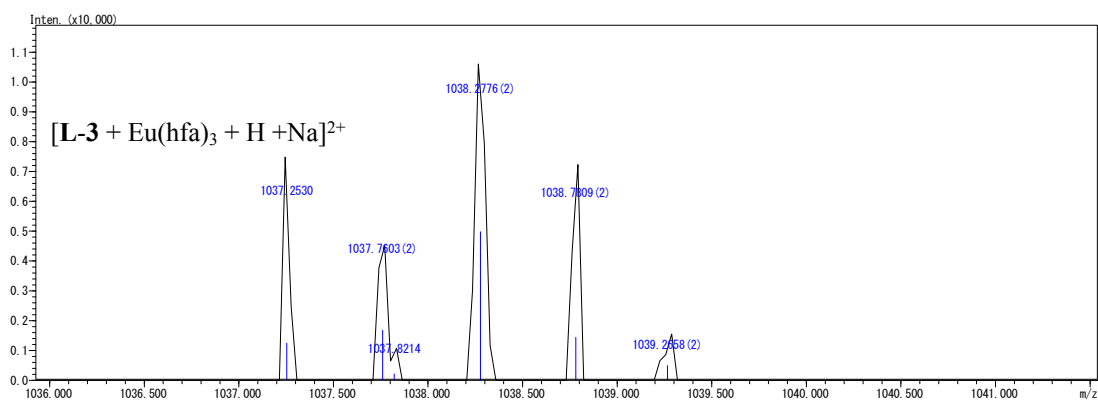

**Fig. S15** Mass spectra of **L-3**/**Eu(hfa)<sub>3</sub>** (1/1)

(a) All range, and (b) expanded range. Found  $m/z$  1037.2530, calcd.  $m/z$  1037.2743 as  $[\text{Eu}(\text{L-3})(\text{hfa})_3 + \text{H} + \text{Na}]^{2+}$ .

(a)

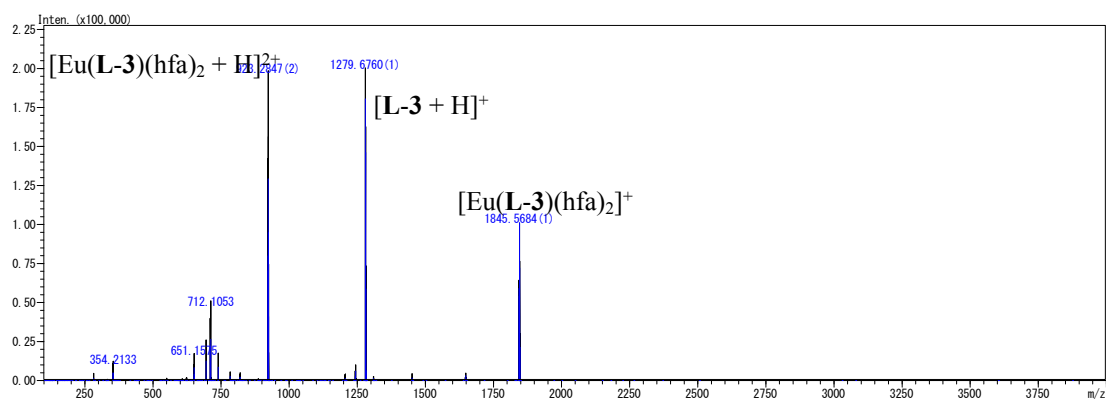

(b)

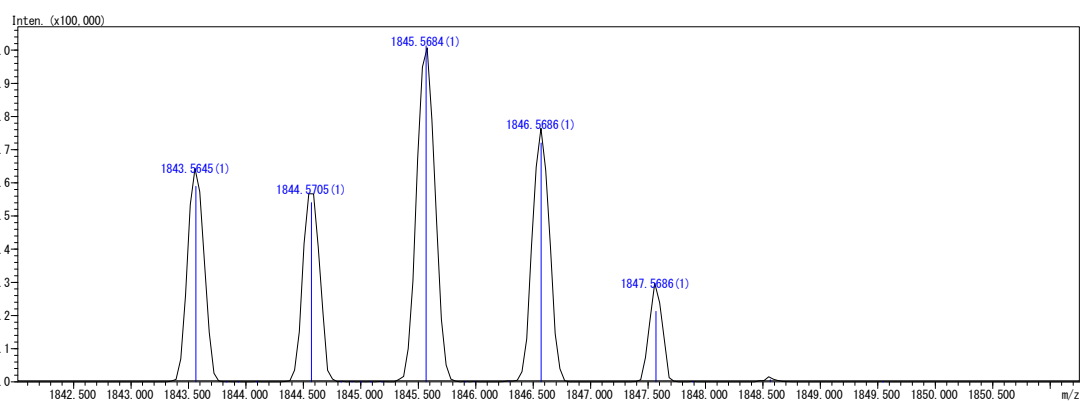

**Fig. S16** Mass spectra of **L-3**/**Eu(hfa)<sub>3</sub>** (1/2)

(a) All range, and (b) expanded range. Found  $m/z$  1845.5684, calcd.  $m/z$  1845.5657 as  $[\text{Eu}(\text{L-3})(\text{hfa})_2]^+$

(a)

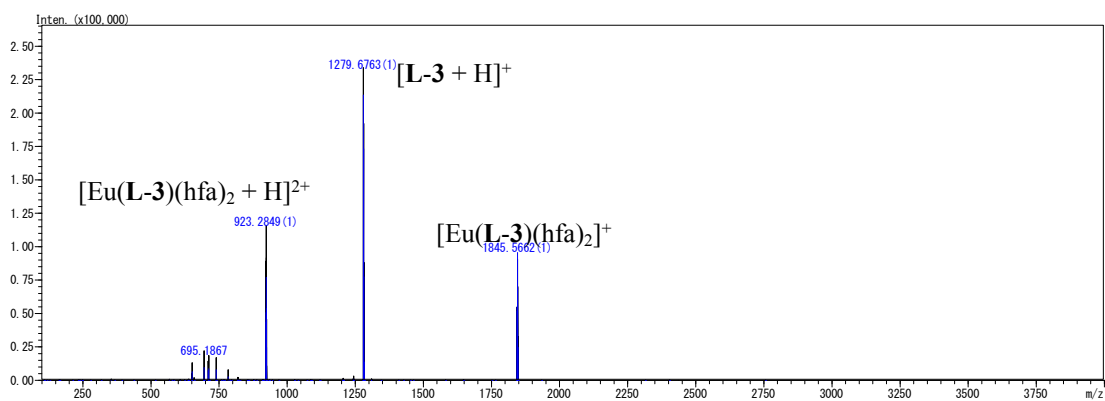

(b)

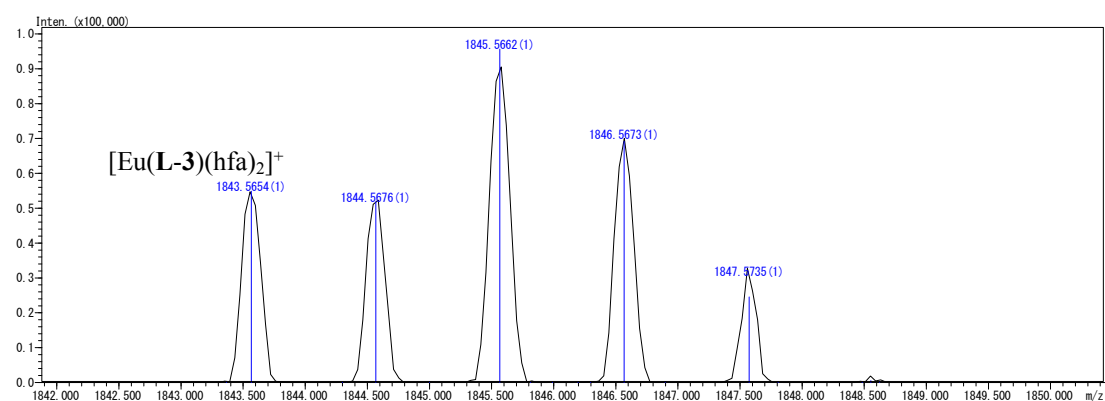

**Fig. S17** Mass spectra of L-3/Eu(hfa)<sub>3</sub> (1/3)

(a) All range, and (b) expanded range. Found  $m/z$  1845.5662, calcd.  $m/z$  1845.5657 as  $[\text{Eu}(\text{L-3})(\text{hfa})_2]^+$ .

(a)

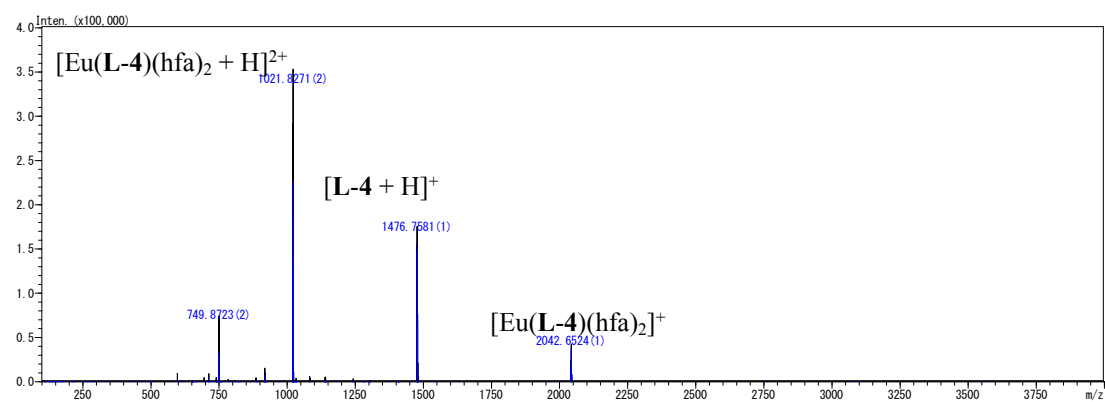

(b)

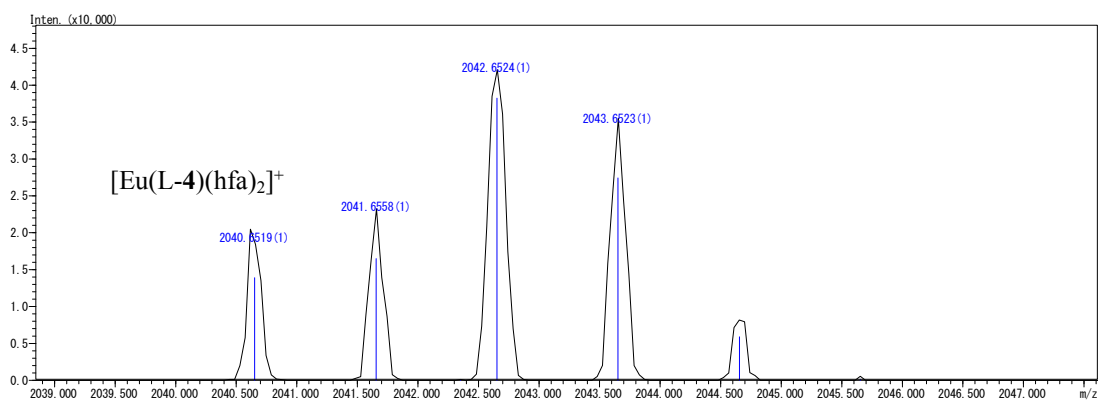

**Fig. S18** Mass spectra of **L-4**/ $\text{Eu}(\text{hfa})_3$  (1/1)

(a) All range, and (b) expanded range. Found  $m/z$  2042.6524, calcd.  $m/z$  2042.6501 as  $[\text{Eu}(\text{L-4})(\text{hfa})_2]^+$ .

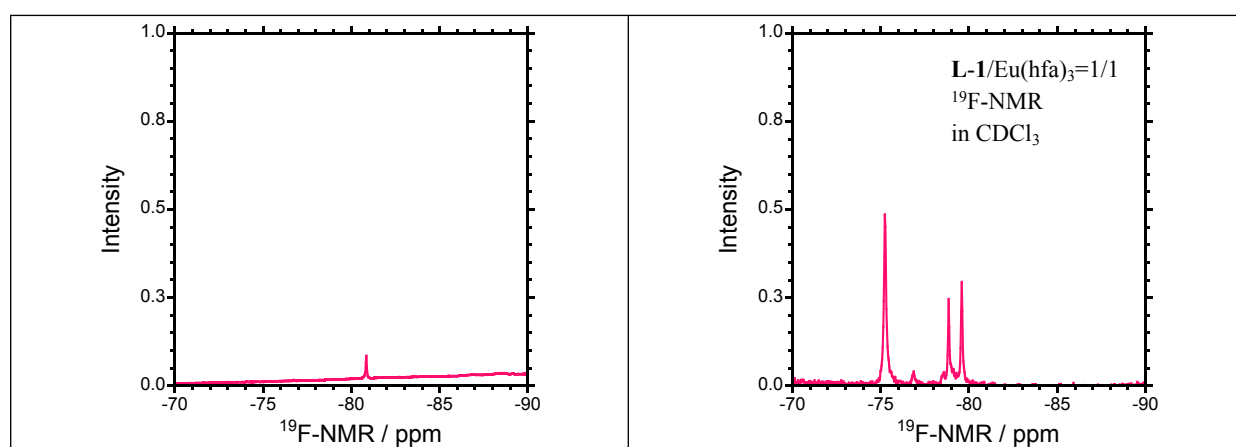

**Fig. S19**  $^{19}\text{F}$ -NMR spectrum of  $\text{Eu}(\text{hfa})_3$  and **L-1**/ $\text{Eu}(\text{hfa})_3$  (1/1) in  $\text{CDCl}_3$

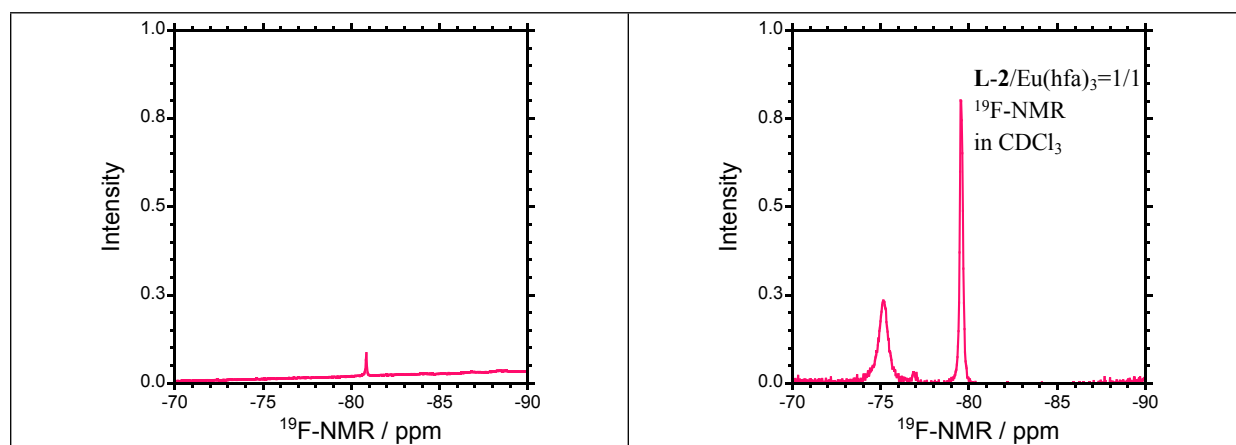

**Fig. S20**  $^{19}\text{F}$ -NMR spectrum of  $\text{Eu}(\text{hfa})_3$  and **L-2**/ $\text{Eu}(\text{hfa})_3$  (1/1) in  $\text{CDCl}_3$

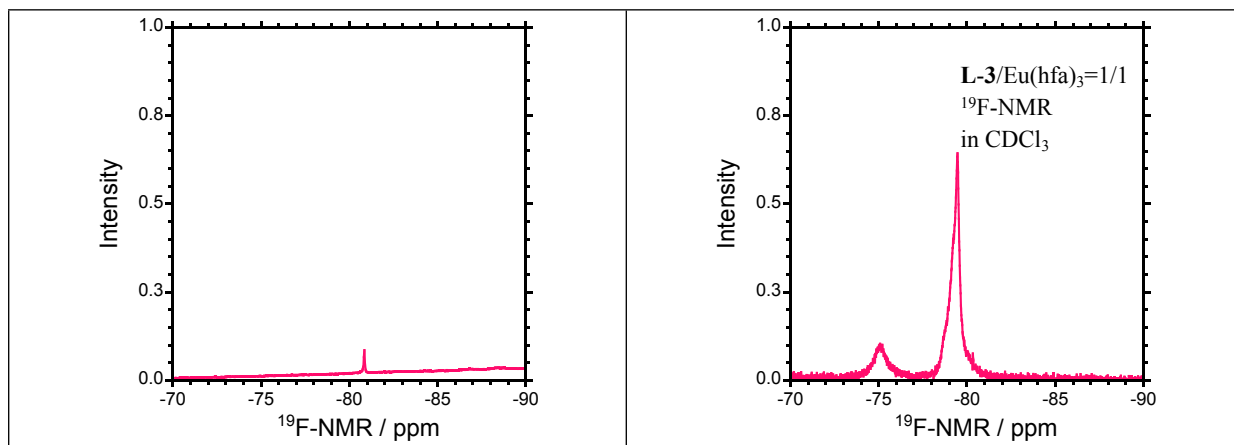

**Fig. S21**  $^{19}\text{F}$ -NMR spectrum of  $\text{Eu}(\text{hfa})_3$  and  $\text{L-3}/\text{Eu}(\text{hfa})_3$  (1/1) in  $\text{CDCl}_3$

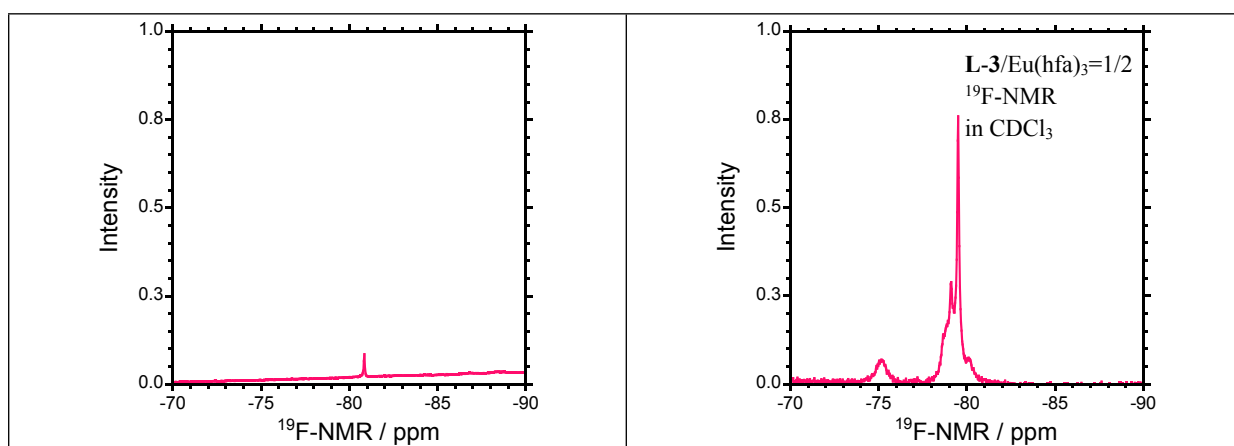

**Fig. S22**  $^{19}\text{F}$ -NMR spectrum of  $\text{Eu}(\text{hfa})_3$  and  $\text{L-3}/\text{Eu}(\text{hfa})_3$  (1/2) in  $\text{CDCl}_3$

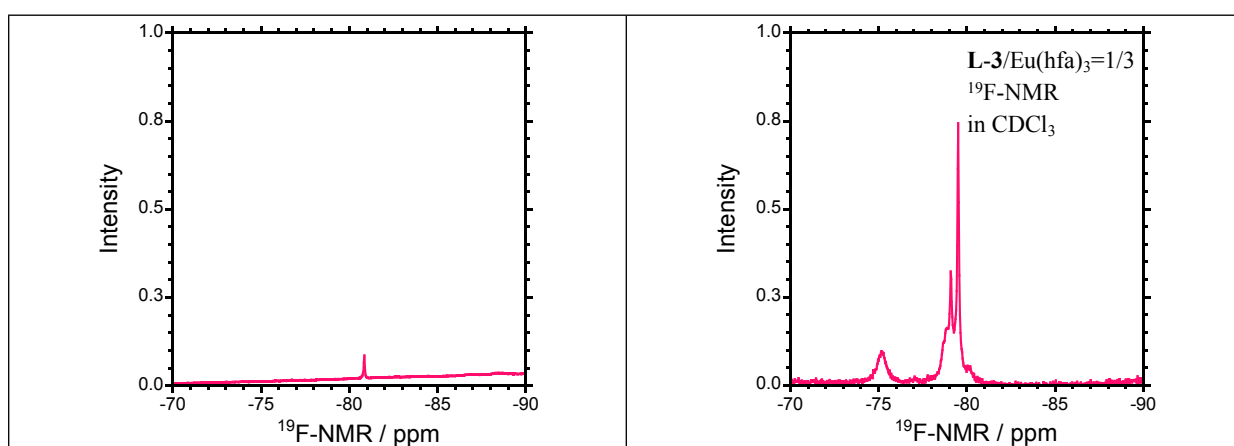

**Fig. S23**  $^{19}\text{F}$ -NMR spectrum of  $\text{Eu}(\text{hfa})_3$  and  $\text{L-3}/\text{Eu}(\text{hfa})_3$  (1/3) in  $\text{CDCl}_3$

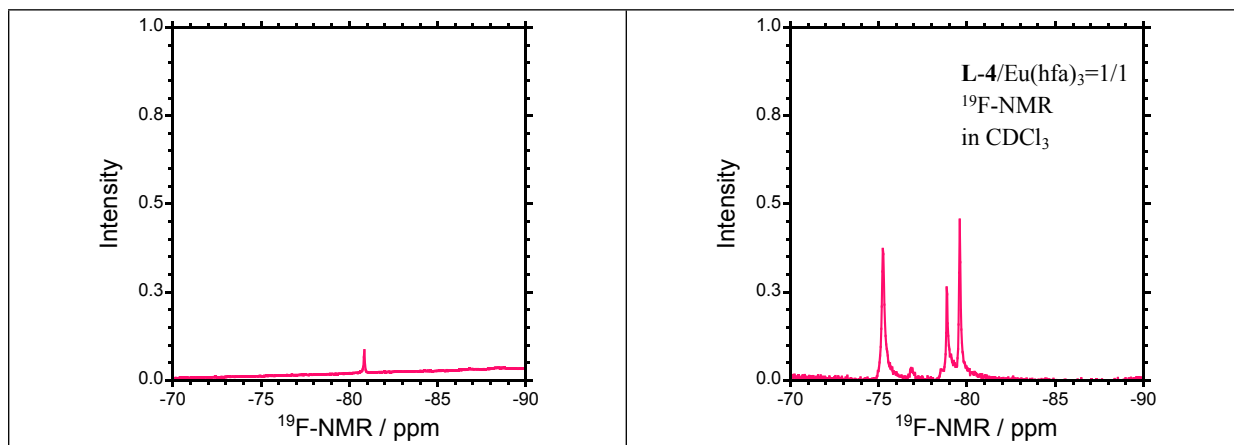

**Fig. S24**  $^{19}\text{F}$ -NMR spectrum of  $\text{Eu}(\text{hfa})_3$  and  $\text{L-4}/\text{Eu}(\text{hfa})_3$  (1/1) in  $\text{CDCl}_3$
